# Supplementary material
Source: publisher figshare collection journal article supplement (https://rs.figshare.com/ndownloader/files/20747823)
Supplement: Supplementary file [file 20747823]

## Supplementary Data

### Prediction of polyproline II secondary structure propensity

Kevin T O'Brien, Catherine Mooney, Cyril Lopez, Gianluca Pollastri and Denis C. Shields

#### Evaluating Performance

To evaluate the performance of PPIIPred we measured the true positive rate (TPR) and false positive rate (FPR) as we increased the discrimination threshold from 0 to 1. The results are shown as a Receiver Operating Characteristic (ROC) curve where TPR is plotted against FPR, which were calculated as follows:

$$\begin{aligned} TPR &= \frac{TP}{TP + FN} \\ FPR &= \frac{FP}{FP + TN} \end{aligned}$$

where:

- True positives (TP): the number of residues predicted in a class that are observed in that class.
- False positives (FP): the number of residues predicted in a class that are not observed in that class.
- True negatives (TN): the number of residues predicted not to be in a class that are not observed in that class.
- False negatives (FN): the number of residues predicted not to be in a class that are observed in that class.

The area under the curve, AUC, which is equivalent to the probability that the classifier will rank a randomly chosen positive instance higher than a randomly chosen negative instance (Fawcett, 2006) is also shown. The AUC is a number between 0 and 1 where 0.5 indicates a random model and 1 is perfect. Python code was used to plot the curves and calculate the AUC. Specificity (Spec), sensitivity (Sens), Matthews Correlation Coefficient (MCC) and the accuracy (Acc) at a 0.2 threshold are measured as follows (Baldi *et al.*, 2000):

$$\begin{aligned} Spec &= 100 \frac{TN}{TN + FP} \\ Sens &= 100 \frac{TP}{TP + FN} \\ MCC &= \frac{TP \times TN - FP \times FN}{\sqrt{(TP + FP)(TP + FN)(TN + FP)(TN + FN)}} \\ Acc &= 100 \frac{TP + TN}{TP + TN + FP + FN} \end{aligned}$$

MCC is an indicator of overall performance between the observed and predicted classifications for both PPIIH and other residues. A value of 1 represents a perfect prediction, 0 a random prediction and  $-1$  a completely inverse prediction.

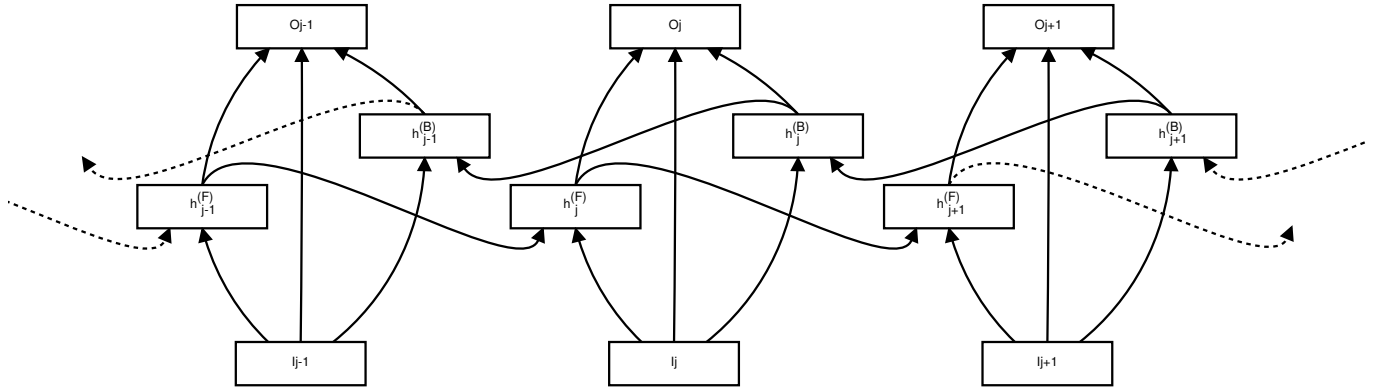

Figure S1: **Graphical representation of a BRNN.** Rectangles represent input, hidden and output vectors. Arrows represent functional dependencies, for example  $o_j$  is a function of  $i_j$ ,  $h_j^{(F)}$  and  $h_j^{(B)}$ ;  $h_j^{(F)}$  is a function of  $i_j$  and  $h_{j-1}^{(F)}$ ; etc. Terminal states  $h_0^{(F)}$  and  $h_{N+1}^{(F)}$  (not represented) complete the graphical model. Notice that any input can, in principle, affect any output.

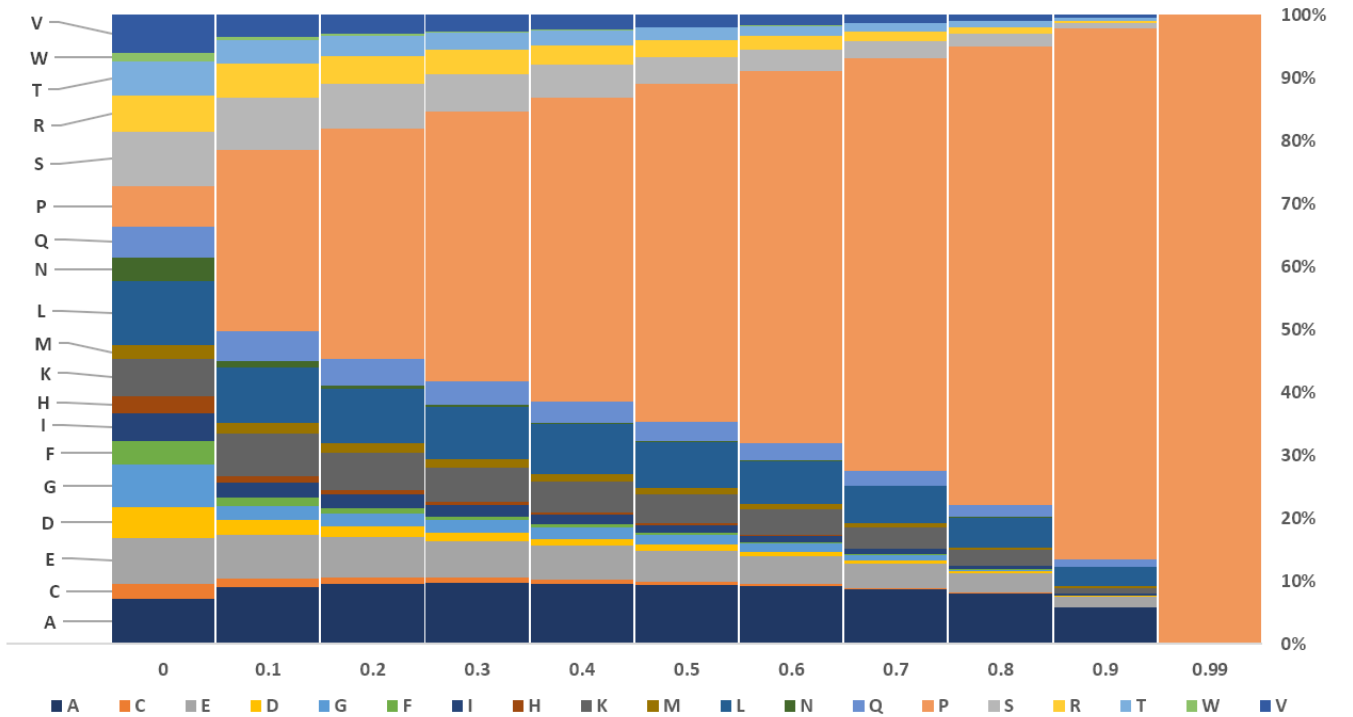

Figure S2: **Amino Acid Composition** (Left) The PPIIH amino acid composition of the TP (strict) dataset. (Right) Predicted amino acid composition of PPII predictions in the human proteome at various cutoffs.

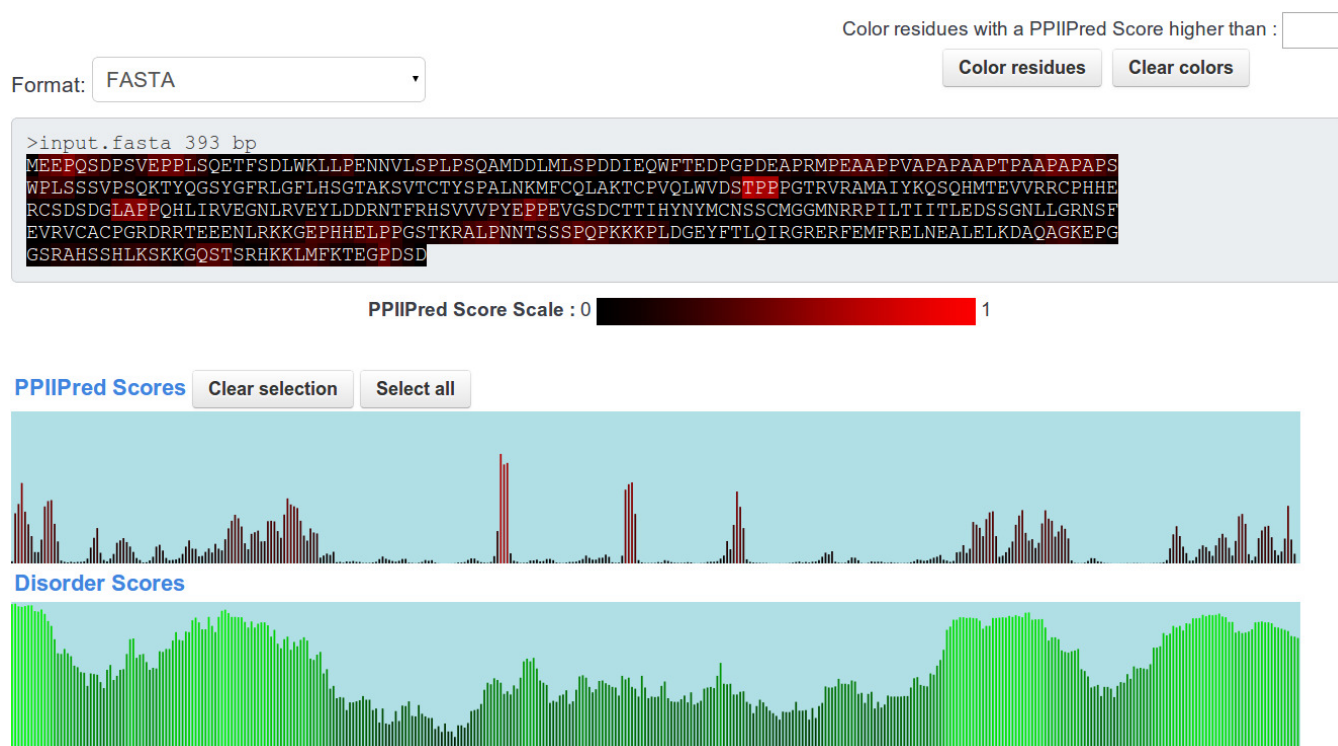

Figure S3: The PPIIPred results interface.

## References

- Baldi, P. *et al.* (2000). Assessing the accuracy of prediction algorithms for classification: an overview. *Bioinformatics*, **16**(5), 412–424.
- Fawcett, T. (2006). An introduction to ROC analysis. *Pattern Recogn Lett*, **27**(8), 861–874.
